# Supplementary material
Source: publisher figshare collection journal article supplement (https://asha.figshare.com/articles/dataset/_/14963553)
Supplement: Supplementary file 1 [file 1]

|     | Target Selection                               |  |  |  |  | Theme Selection                                |  |  |  |  | Agent Selection                                |  |  |  |  |
|-----|------------------------------------------------|--|--|--|--|------------------------------------------------|--|--|--|--|------------------------------------------------|--|--|--|--|
| YN  | Random effects:                                |  |  |  |  | Random effects:                                |  |  |  |  | Random effects:                                |  |  |  |  |
|     | <u>Variance Std.Dev.</u>                       |  |  |  |  | <u>Variance Std.Dev.</u>                       |  |  |  |  | <u>Variance Std.Dev.</u>                       |  |  |  |  |
|     | Sentence (Intercept)                           |  |  |  |  | Sentence (Intercept)                           |  |  |  |  | Sentence (Intercept)                           |  |  |  |  |
|     | Subject (Intercept)                            |  |  |  |  | Subject (Intercept)                            |  |  |  |  | Subject (Intercept)                            |  |  |  |  |
|     | Fixed effects:                                 |  |  |  |  | Fixed effects:                                 |  |  |  |  | Fixed effects:                                 |  |  |  |  |
|     | <u>Estimate Std. Error z value Pr(&gt; z )</u> |  |  |  |  | <u>Estimate Std. Error z value Pr(&gt; z )</u> |  |  |  |  | <u>Estimate Std. Error z value Pr(&gt; z )</u> |  |  |  |  |
|     | (Intercept)                                    |  |  |  |  | (Intercept)                                    |  |  |  |  | (Intercept)                                    |  |  |  |  |
|     | ArgStatus1                                     |  |  |  |  | ArgStatus1                                     |  |  |  |  | ArgStatus1                                     |  |  |  |  |
|     | Plausibility1                                  |  |  |  |  | Plausibility1                                  |  |  |  |  | Plausibility1                                  |  |  |  |  |
|     | ArgStatus1:Plausibility1                       |  |  |  |  | ArgStatus1:Plausibility1                       |  |  |  |  | ArgStatus1:Plausibility1                       |  |  |  |  |
| ON  | Random effects:                                |  |  |  |  | Random effects:                                |  |  |  |  | Random effects:                                |  |  |  |  |
|     | <u>Variance Std.Dev.</u>                       |  |  |  |  | <u>Variance Std.Dev.</u>                       |  |  |  |  | <u>Variance Std.Dev.</u>                       |  |  |  |  |
|     | Sentence (Intercept)                           |  |  |  |  | Sentence (Intercept)                           |  |  |  |  | Sentence (Intercept)                           |  |  |  |  |
|     | Subject (Intercept)                            |  |  |  |  | Subject (Intercept)                            |  |  |  |  | Subject (Intercept)                            |  |  |  |  |
|     | Fixed effects:                                 |  |  |  |  | Fixed effects:                                 |  |  |  |  | Fixed effects:                                 |  |  |  |  |
|     | <u>Estimate Std. Error z value Pr(&gt; z )</u> |  |  |  |  | <u>Estimate Std. Error z value Pr(&gt; z )</u> |  |  |  |  | <u>Estimate Std. Error z value Pr(&gt; z )</u> |  |  |  |  |
|     | (Intercept)                                    |  |  |  |  | (Intercept)                                    |  |  |  |  | (Intercept)                                    |  |  |  |  |
|     | ArgStatus1                                     |  |  |  |  | ArgStatus1                                     |  |  |  |  | ArgStatus1                                     |  |  |  |  |
|     | Plausibility1                                  |  |  |  |  | Plausibility1                                  |  |  |  |  | Plausibility1                                  |  |  |  |  |
|     | ArgStatus1:Plausibility1                       |  |  |  |  | ArgStatus1:Plausibility1                       |  |  |  |  | ArgStatus1:Plausibility1                       |  |  |  |  |
| PWA | Random effects:                                |  |  |  |  | Random effects:                                |  |  |  |  | Random effects:                                |  |  |  |  |
|     | <u>Variance Std.Dev.</u>                       |  |  |  |  | <u>Variance Std.Dev.</u>                       |  |  |  |  | <u>Variance Std.Dev.</u>                       |  |  |  |  |
|     | Sentence (Intercept)                           |  |  |  |  | Sentence (Intercept)                           |  |  |  |  | Sentence (Intercept)                           |  |  |  |  |
|     | Subject (Intercept)                            |  |  |  |  | Subject (Intercept)                            |  |  |  |  | Subject (Intercept)                            |  |  |  |  |
|     | Fixed effects:                                 |  |  |  |  | Fixed effects:                                 |  |  |  |  | Fixed effects:                                 |  |  |  |  |
|     | <u>Estimate Std. Error z value Pr(&gt; z )</u> |  |  |  |  | <u>Estimate Std. Error z value Pr(&gt; z )</u> |  |  |  |  | <u>Estimate Std. Error z value Pr(&gt; z )</u> |  |  |  |  |
|     | (Intercept)                                    |  |  |  |  | (Intercept)                                    |  |  |  |  | (Intercept)                                    |  |  |  |  |
|     | ArgStatus1                                     |  |  |  |  | ArgStatus1                                     |  |  |  |  | ArgStatus1                                     |  |  |  |  |
|     | Plausibility1                                  |  |  |  |  | Plausibility1                                  |  |  |  |  | Plausibility1                                  |  |  |  |  |
|     | ArgStatus1:Plausibility1                       |  |  |  |  | ArgStatus1:Plausibility1                       |  |  |  |  | ArgStatus1:Plausibility1                       |  |  |  |  |

Supplemental Material S1. Full model results for image selection responses.
