# Supplementary material
Source: publisher figshare collection journal article supplement (https://asha.figshare.com/articles/dataset/_/14963553)
Supplement: Supplementary file 2 [file 1]

# Supplemental Material S4. Linguistic stimuli.

| <u>Item</u> | <u>Condition</u> | <u>Sentence</u>                                                                           |
|-------------|------------------|-------------------------------------------------------------------------------------------|
| 1           | arg plaus        | The guest is a teenager, so the students are bringing him excitedly to the fair           |
|             | arg imp          | The guest is a teenager, so the students are bringing him excitedly to the bar            |
|             | adj plaus        | The guest is a teenager, so the students are meeting him excitedly at the fair            |
|             | adj imp          | The guest is a teenager, so the students are meeting him excitedly at the bar             |
| 2           | arg plaus        | The medal is valuable, so the detective is tucking it wisely in the safe                  |
|             | arg imp          | The medal is valuable, so the detective is tucking it wisely in the trash                 |
|             | adj plaus        | The medal is valuable, so the detective is looking at it wisely in the safe               |
|             | adj imp          | The medal is valuable, so the detective is looking at it wisely in the trash              |
| 3           | arg plaus        | The iced tea is expensive, so the child is pouring it cautiously in a glass               |
|             | arg imp          | The iced tea is expensive, so the child is pouring it cautiously in the bowl              |
|             | adj plaus        | The iced tea is expensive, so the child is drinking it cautiously in a glass              |
|             | adj imp          | The iced tea is expensive, so the child is drinking it cautiously in the bowl             |
| 4           | arg plaus        | The painting is large, so the museum curator is hanging it proudly in the gallery         |
|             | arg imp          | The painting is large, so the museum curator is hanging it proudly in the cave            |
|             | adj plaus        | The painting is large, so the museum curator is noticing it proudly in the gallery        |
|             | adj imp          | The painting is large, so the museum curator is noticing it proudly in the cave           |
| 5           | arg plaus        | The gravy is hot, so the cook is ladling it gingerly onto the dinner plates               |
|             | arg imp          | The gravy is hot, so the cook is ladling it gingerly onto the jewelry box                 |
|             | adj plaus        | The gravy is hot, so the cook is tasting it gingerly from the dinner plates               |
|             | adj imp          | The gravy is hot, so the cook is tasting it gingerly from the jewelry box                 |
| 6           | arg plaus        | The paper towel is sticky, so the boy is flinging it disgustedly into the trash           |
|             | arg imp          | The paper towel is sticky, so the boy is flinging it disgustedly into the office          |
|             | adj plaus        | The paper towel is sticky, but the boy is grabbing it disgustedly from the trash          |
|             | adj imp          | The paper towel is sticky, but the boy is grabbing it disgustedly from the office         |
| 7           | arg plaus        | The letter is important, so the woman is sending it immediately to her office             |
|             | arg imp          | The letter is important, so the woman is sending it immediately to her tree               |
|             | adj plaus        | The letter is important, so the woman is answering it immediately from her office         |
|             | adj imp          | The letter is important, so the woman is answering it immediately from her tree           |
| 8           | arg plaus        | The shopping cart wheel is squeaky, but the shopper is pushing it easily into the store   |
|             | arg imp          | The shopping cart wheel is squeaky, but the shopper is pushing it easily into the gallery |
|             | adj plaus        | The shopping cart wheel is squeaky, so the shopper is hearing it easily in the store      |
|             | adj imp          | The shopping cart wheel is squeaky, so the shopper is hearing it easily in the gallery    |
| 9           | arg plaus        | The diamond earring is tiny, so the mother is putting it with difficulty into her ear     |
|             | arg imp          | The diamond earring is tiny, so the mother is putting it with difficulty in the glass     |
|             | adj plaus        | The diamond earring is tiny, so the mother is seeing it with difficulty in her ear        |
|             | adj imp          | The diamond earring is tiny, so the mother is seeing it with difficulty in the glass      |
| 10          | arg plaus        | The dog is ill, so the veterinarian is setting him gently on the exam table               |
|             | arg imp          | The dog is ill, so the veterinarian is setting him gently on the school desk              |

|    |           |                                                                                              |
|----|-----------|----------------------------------------------------------------------------------------------|
|    | adj plaus | The dog is ill, so the veterinarian is examining him gently on the exam table                |
|    | adj imp   | The dog is ill, so the veterinarian is examining him gently on the school desk               |
| 11 | arg plaus | The gum is forbidden, so the small child is sticking it slyly under the school desk          |
|    | arg imp   | The gum is forbidden, so the small child is sticking it slyly under the girl's ear           |
|    | adj plaus | The gum is forbidden, so the small child is enjoying it slyly under the school desk          |
|    | adj imp   | The gum is forbidden, so the small child is enjoying it slyly under the girl's ear           |
| 12 | arg plaus | The diary is private, so the young girl is tucking it secretly into her closet               |
|    | arg imp   | The diary is private, so the young girl is tucking it secretly into the stove                |
|    | adj plaus | The diary is private, so the young girl is opening it secretly in her closet                 |
|    | adj imp   | The diary is private, so the young girl is opening it secretly in the stove                  |
| 13 | arg plaus | The holiday present is heavy, so the woman is sliding it effortfully under the tree          |
|    | arg imp   | The holiday present is heavy, so the woman is sliding it effortfully under the tripod        |
|    | adj plaus | The holiday present is heavy, so the woman is opening it effortfully under the tree          |
|    | adj imp   | The holiday present is heavy, so the woman is opening it effortfully under the tripod        |
| 14 | arg plaus | The bowl of ice cream is over-flowing, so the girl is carrying it quickly to the table       |
|    | arg imp   | The bowl of ice cream is over-flowing, so the girl is carrying it quickly to the podium      |
|    | adj plaus | The bowl of ice cream is over-flowing, so the girl is grabbing it quickly from the table     |
|    | adj imp   | The bowl of ice cream is over-flowing, so the girl is grabbing it quickly from the podium    |
| 15 | arg plaus | The engagement ring is valuable, so the woman is placing it carefully in the jewelry box     |
|    | arg imp   | The engagement ring is valuable, so the woman is placing it carefully in the plastic cups    |
|    | adj plaus | The engagement ring is valuable, so the woman is looking at it carefully in the jewelry box  |
|    | adj imp   | The engagement ring is valuable, so the woman is looking at it carefully in the plastic cups |
| 16 | arg plaus | The cereal is new, so the little girl is pouring it apprehensively in the bowl               |
|    | arg imp   | The cereal is new, so the little girl is pouring it apprehensively in the case               |
|    | adj plaus | The cereal is new, so the little girl is tasting it apprehensively in the bowl               |
|    | adj imp   | The cereal is new, so the little girl is tasting it apprehensively in the case               |
| 17 | arg plaus | The beer is chilled, so the man is bringing it quickly to the bar                            |
|    | arg imp   | The beer is chilled, so the man is bringing it quickly to the office                         |
|    | adj plaus | The beer is chilled, so the man is enjoying it quickly at the bar                            |
|    | adj imp   | The beer is chilled, so the man is enjoying it quickly at the office                         |
| 18 | arg plaus | The punch is popular, so the party guests are ladling it rapidly into the plastic cups       |
|    | arg imp   | The punch is popular, so the party guests are ladling it rapidly onto the dinner plates      |
|    | adj plaus | The punch is popular, so the party guests are drinking it rapidly from the plastic cups      |
|    | adj imp   | The punch is popular, so the party guests are drinking it rapidly from the dinner plates     |

- |    |           |                                                                                        |
|----|-----------|----------------------------------------------------------------------------------------|
| 19 | arg plaus | The student is failing, so the teacher is sending him worriedly to the office          |
|    | arg imp   | The student is failing, so the teacher is sending him worriedly to the basement        |
|    | adj plaus | The student is failing, so the teacher is meeting him worriedly in the office          |
|    | adj imp   | The student is failing, so the teacher is meeting him worriedly in the basement        |
| 20 | arg plaus | The laptop is expensive, so the businessman is putting it carefully in the Case        |
|    | arg imp   | The laptop is expensive, so the businessman is putting it carefully in the bowl        |
|    | adj plaus | The laptop is expensive, so the businessman is storing it carefully in the case        |
|    | adj imp   | The laptop is expensive, so the businessman is storing it carefully in the bowl        |
| 21 | arg plaus | The teapot is steamy, so the lady is placing it carefully on the stove                 |
|    | arg imp   | The teapot is steamy, so the lady is placing it carefully on the bench                 |
|    | adj plaus | The teapot is steamy, so the lady is grabbing it carefully from the stove              |
|    | adj imp   | The teapot is steamy, so the lady is grabbing it carefully from the bench              |
| 22 | arg plaus | The cat is loud, so the owner is setting him angrily in the basement                   |
|    | arg imp   | The cat is loud, so the owner is setting him angrily in the store                      |
|    | adj plaus | The cat is loud, so the owner is listening to him angrily in the basement              |
|    | adj imp   | The cat is loud, so the owner is listening to him angrily in the store                 |
| 23 | arg plaus | The painting is frustrating, so the artist is knocking it bitterly onto the floor      |
|    | arg imp   | The painting is frustrating, so the artist is knocking it bitterly onto the highchair  |
|    | adj plaus | The painting is frustrating, so the artist is finishing it bitterly on the floor       |
|    | adj imp   | The painting is frustrating, so the artist is finishing it bitterly on the highchair   |
| 24 | arg plaus | The note is important, so the boss is sticking it prudently on the door                |
|    | arg imp   | The note is important, so the boss is sticking it prudently on the floor               |
|    | adj plaus | The note is important, so the boss is reading it prudently on the door                 |
|    | adj imp   | The note is important, so the boss is reading it prudently on the floor                |
| 25 | arg plaus | The award is meaningless, so the competitor is flinging it resentfully at the podium   |
|    | arg imp   | The award is meaningless, so the competitor is flinging it resentfully at the pole     |
|    | adj plaus | The award is meaningless, so the competitor is glaring at it resentfully on the podium |
|    | adj imp   | The award is meaningless, so the competitor is glaring at it resentfully on the pole   |
| 26 | arg plaus | The crackers are delicious, so the woman is pouring them hungrily onto the plate       |
|    | arg imp   | The crackers are delicious, so the woman is pouring them hungrily onto the armchair    |
|    | adj plaus | The crackers are delicious, so the woman is eating them hungrily from the plate        |
|    | adj imp   | The crackers are delicious, so the woman is eating them hungrily from the armchair     |
| 27 | arg plaus | The stew is hot, so the family is ladling it slowly into the bowls                     |
|    | arg imp   | The stew is hot, so the family is ladling it slowly into the closet                    |
|    | adj plaus | The stew is hot, so the family is eating it slowly from the bowls                      |
|    | adj imp   | The stew is hot, so the family is eating it slowly from the closet                     |
| 28 | arg plaus | The camera is heavy, so the photographer is tacking it forcibly onto the tripod        |
|    | arg imp   | The camera is heavy, so the photographer is tacking it forcibly onto the door          |
|    | adj plaus | The camera is heavy, so the photographer is breaking it forcibly off the tripod        |
|    | adj imp   | The camera is heavy, so the photographer is breaking it forcibly off the door          |

- |    |           |                                                                                         |
|----|-----------|-----------------------------------------------------------------------------------------|
| 29 | arg plaus | The personal ad is interesting, so the editor is pinning it happily on the wall         |
|    | arg imp   | The personal ad is interesting, so the editor is pinning it happily on the stairs       |
|    | adj plaus | The personal ad is interesting, so the editor is answering it happily on the wall       |
|    | adj imp   | The personal ad is interesting, so the editor is answering it happily on the stairs     |
| 30 | arg plaus | The treasure is secret, so the pirate is sliding it covertly into the cave              |
|    | arg imp   | The treasure is secret, so the pirate is sliding it covertly into the fair              |
|    | adj plaus | The treasure is secret, so the pirate is examining it covertly in the cave              |
|    | adj imp   | The treasure is secret, so the pirate is examining it covertly in the fair              |
| 31 | arg plaus | The dresser is large, so the movers are pushing it slowly into the bedroom              |
|    | arg imp   | The dresser is large, so the movers are pushing it slowly into the tomb                 |
|    | adj plaus | The dresser is large, so the movers are opening it slowly in the bedroom                |
|    | adj imp   | The dresser is large, so the movers are opening it slowly in the tomb                   |
| 32 | arg plaus | The artifact is a fake, so the archaeologist is throwing it dejectedly into the tomb    |
|    | arg imp   | The artifact is a fake, so the archaeologist is throwing it dejectedly into the bedroom |
|    | adj plaus | The artifact is a fake, so the archaeologist is examining it dejectedly in the tomb     |
|    | adj imp   | The artifact is a fake, so the archaeologist is examining it dejectedly in the bedroom  |
| 33 | arg plaus | The globe is large, and the professor is resting it distractedly on the desk            |
|    | arg imp   | The globe is large, and the professor is resting it distractedly on the car             |
|    | adj plaus | The globe is large, and the professor is rotating it distractedly on the desk           |
|    | adj imp   | The globe is large, and the professor is rotating it distractedly on the car            |
| 34 | arg plaus | The jacket is old, and the teenager is hanging it carelessly on the armchair            |
|    | arg imp   | The jacket is old, and the teenager is hanging it carelessly on the exam table          |
|    | adj plaus | The jacket is old, and the teenager is ripping it carelessly on the armchair            |
|    | adj imp   | The jacket is old, and the teenager is ripping it carelessly on the exam table          |
| 35 | arg plaus | The child is noisy, so the mother is pulling him irritatedly into the car               |
|    | arg imp   | The child is noisy, so the mother is pulling him irritatedly into the safe              |
|    | adj plaus | The child is noisy, so the mother is listening to him irritatedly in the car            |
|    | adj imp   | The child is noisy, so the mother is listening to him irritatedly in the safe           |
| 36 | arg plaus | The books are heavy, so the people are resting them briefly on the bench                |
|    | arg imp   | The books are heavy, so the people are resting them briefly on the bed                  |
|    | adj plaus | The books are heavy, so the people are enjoying them briefly on the bench               |
|    | adj imp   | The books are heavy, so the people are enjoying them briefly on the bed                 |
| 37 | arg plaus | The bottle is unstable, and the baby is knocking it accidentally onto the stairs        |
|    | arg imp   | The bottle is unstable, and the baby is knocking it accidentally onto the wall          |
|    | adj plaus | The bottle is unstable, and the baby is breaking it accidentally on the stairs          |
|    | adj imp   | The bottle is unstable, and the baby is breaking it accidentally on the wall            |
| 38 | arg plaus | The poster is torn, so the man is pinning it carefully to the pole                      |
|    | arg imp   | The poster is torn, so the man is pinning it carefully to the table                     |
|    | adj plaus | The poster is torn, so the man is moving it carefully from the pole                     |
|    | adj imp   | The poster is torn, so the man is moving it carefully from the table                    |
| 39 | arg plaus | The project is frustrating so the student is throwing it angrily on the bed             |

|    |           |                                                                                |
|----|-----------|--------------------------------------------------------------------------------|
|    | arg imp   | The project is frustrating so the student is throwing it angrily on the plate  |
|    | adj plaus | The project is frustrating so the student is finishing it angrily on the bed   |
|    | adj imp   | The project is frustrating so the student is finishing it angrily on the plate |
| 40 | arg plaus | The cheerios are stale, so the baby is flinging them fussily on the highchair  |
|    | arg imp   | The cheerios are stale, so the baby is flinging them fussily on the desk       |
|    | adj plaus | The cheerios are stale, so the baby is eating them fussily on the highchair    |
|    | adj imp   | The cheerios are stale, so the baby is eating them fussily on the desk         |
