# Supplementary material
Source: publisher figshare collection journal article supplement (https://asha.figshare.com/articles/dataset/_/14963553)
Supplement: Supplementary file 3 [file 1]

|             | Target Fixation          |                          |                   |                    |                    | Theme Fixation  |                          |                          |                    |                    | Agent Fixation  |                   |                          |                          |                    |         |        |           |
|-------------|--------------------------|--------------------------|-------------------|--------------------|--------------------|-----------------|--------------------------|--------------------------|--------------------|--------------------|-----------------|-------------------|--------------------------|--------------------------|--------------------|---------|--------|-----------|
| YN          | Random effects:          |                          |                   |                    |                    | Random effects: |                          |                          |                    |                    | Random effects: |                   |                          |                          |                    |         |        |           |
|             |                          |                          | <u>Variance</u>   | <u>Std.Dev.</u>    |                    |                 |                          | <u>Variance</u>          | <u>Std.Dev.</u>    |                    |                 |                   | <u>Variance</u>          | <u>Std.Dev.</u>          |                    |         |        |           |
|             | Sentence                 | (Intercept)              | 0.20225           | 0.4497             |                    | Sentence        | (Intercept)              | 0.31946                  | 0.5652             |                    | Sentence        | (Intercept)       | 0.261704                 | 0.51157                  |                    |         |        |           |
|             | Subject                  | (Intercept)              | 0.2003            | 0.4475             |                    | Subject         | (Intercept)              | 0.04202                  | 0.205              |                    | Subject         | (Intercept)       | 0.048321                 | 0.21982                  |                    |         |        |           |
|             |                          | Plausibility             | 0.08404           | 0.2899             |                    |                 | Plausibility1            | 0.06861                  | 0.2619             |                    |                 | Plausibility1     | 0.001407                 | 0.03751                  |                    |         |        |           |
|             |                          | ArgStatus                | 0.03748           | 0.1936             |                    |                 | ArgStatus1               | 0.03102                  | 0.1761             |                    |                 | ArgStatus1        | 0.003383                 | 0.05816                  |                    |         |        |           |
|             |                          | Plaus:Arg                | 0.16339           | 0.4042             |                    |                 |                          |                          |                    |                    |                 |                   |                          |                          |                    |         |        |           |
|             | Fixed effects:           |                          |                   |                    |                    | Fixed effects:  |                          |                          |                    |                    | Fixed effects:  |                   |                          |                          |                    |         |        |           |
|             |                          | <u>Estimate</u>          | <u>Std. Error</u> | <u>z value</u>     | <u>Pr(&gt; z )</u> |                 | <u>Estimate</u>          | <u>Std. Error</u>        | <u>z value</u>     | <u>Pr(&gt; z )</u> |                 | <u>Estimate</u>   | <u>Std. Error</u>        | <u>z value</u>           | <u>Pr(&gt; z )</u> |         |        |           |
|             | (Intercept)              | -0.624894                | 0.07979           | -7.832             | 4.81E-15           | (Intercept)     | -1.54281                 | 0.06137                  | -25.14             | < 2e-16            | (Intercept)     | -1.30979          | 0.0587                   | -22.312                  | < 2e-16            |         |        |           |
| ON          |                          | Plausibility1            | 0.833829          | 0.095104           | 8.768              | < 2e-16         |                          | Plausibility1            | -0.40781           | 0.11221            | -3.634          | 0.000279          |                          | Plausibility1            | -0.37226           | 0.09587 | -3.883 | 0.000103  |
|             |                          | ArgStatus1               | 0.201549          | 0.089147           | 2.261              | 0.0238          |                          | ArgStatus1               | -0.09322           | 0.10797            | -0.863          | 0.387931          |                          | ArgStatus1               | -0.18861           | 0.09603 | -1.964 | 0.04953   |
|             |                          | Plausibility1:ArgStatus1 | 0.008144          | 0.179235           | 0.045              | 0.9638          |                          | Plausibility1:ArgStatus1 | 0.12656            | 0.20932            | 0.605           | 0.545417          |                          | Plausibility1:ArgStatus1 | -0.06353           | 0.19048 | -0.334 | 0.738755  |
|             | Random effects:          |                          |                   |                    |                    | Random effects: |                          |                          |                    |                    | Random effects: |                   |                          |                          |                    |         |        |           |
|             |                          | <u>Variance</u>          | <u>Std.Dev.</u>   |                    |                    |                 | <u>Variance</u>          | <u>Std.Dev.</u>          |                    |                    |                 | <u>Variance</u>   | <u>Std.Dev.</u>          |                          |                    |         |        |           |
|             | Sentence                 | (Intercept)              | 0.186619          | 0.43199            |                    | Sentence        | (Intercept)              | 0.33539                  | 0.5791             |                    | Sentence        | (Intercept)       | 0.323                    | 0.569                    |                    |         |        |           |
|             | Subject                  | (Intercept)              | 0.066384          | 0.25765            |                    | Subject         | (Intercept)              | 0.08031                  | 0.2834             |                    | Subject         | (Intercept)       | 6.34E-10                 | 0.0000252                |                    |         |        |           |
|             |                          | Plausibility1            | 0.012502          | 0.11181            |                    |                 | Plausibility1            | 0.01159                  | 0.1077             |                    |                 |                   |                          |                          |                    |         |        |           |
|             |                          | ArgStatus1               | 0.003538          | 0.05948            |                    |                 | ArgStatus1               | 0.03041                  | 0.1744             |                    |                 |                   |                          |                          |                    |         |        |           |
|             | Fixed effects:           |                          |                   |                    |                    | Fixed effects:  |                          |                          |                    |                    | Fixed effects:  |                   |                          |                          |                    |         |        |           |
|             | <u>Estimate</u>          | <u>Std. Error</u>        | <u>z value</u>    | <u>Pr(&gt; z )</u> |                    | <u>Estimate</u> | <u>Std. Error</u>        | <u>z value</u>           | <u>Pr(&gt; z )</u> |                    | <u>Estimate</u> | <u>Std. Error</u> | <u>z value</u>           | <u>Pr(&gt; z )</u>       |                    |         |        |           |
| (Intercept) | -0.67906                 | 0.07874                  | -8.624            | <2e-16             | (Intercept)        | -1.36347        | 0.09218                  | -14.791                  | < 2e-16            | (Intercept)        | -1.34139        | 0.06133           | -21.871                  | < 2e-16                  |                    |         |        |           |
| PWA         |                          | Plausibility1            | 1.00118           | 0.10188            | 9.827              | <2e-16          |                          | Plausibility1            | -0.35052           | 0.12474            | -2.81           | 0.00495           |                          | Plausibility1            | -0.47652           | 0.12013 | -3.967 | 0.0000729 |
|             |                          | ArgStatus1               | 0.19766           | 0.09901            | 1.996              | 0.0459          |                          | ArgStatus1               | -0.14253           | 0.12909            | -1.104          | 0.26956           |                          | ArgStatus1               | -0.19668           | 0.12008 | -1.638 | 0.101     |
|             |                          | Plausibility1:ArgStatus1 | 0.08154           | 0.19541            | 0.417              | 0.6765          |                          | Plausibility1:ArgStatus1 | -0.09837           | 0.24349            | -0.404          | 0.68622           |                          | Plausibility1:ArgStatus1 | 0.0384             | 0.24031 | 0.16   | 0.873     |
|             | Random effects:          |                          |                   |                    |                    | Random effects: |                          |                          |                    |                    | Random effects: |                   |                          |                          |                    |         |        |           |
|             |                          | <u>Variance</u>          | <u>Std.Dev.</u>   |                    |                    |                 | <u>Variance</u>          | <u>Std.Dev.</u>          |                    |                    |                 | <u>Variance</u>   | <u>Std.Dev.</u>          |                          |                    |         |        |           |
|             | Sentence                 | (Intercept)              | 0.36893           | 0.6074             |                    | Sentence        | (Intercept)              | 0.29979                  | 0.5475             |                    | Sentence        | (Intercept)       | 0.46223                  | 0.6799                   |                    |         |        |           |
|             | Subject                  | (Intercept)              | 0.08818           | 0.2969             |                    | Subject         | (Intercept)              | 0.02772                  | 0.1665             |                    | Subject         | (Intercept)       | 0.01934                  | 0.1391                   |                    |         |        |           |
|             |                          | Plausibility1            | 0.23753           | 0.4874             |                    |                 | Plausibility1            | 0.05306                  | 0.2303             |                    |                 | Plausibility1     | 0.09202                  | 0.3033                   |                    |         |        |           |
|             |                          | ArgStatus1               | 0.08252           | 0.2873             |                    |                 | ArgStatus1               | 0.0137                   | 0.117              |                    |                 | ArgStatus1        | 0.09271                  | 0.3045                   |                    |         |        |           |
|             | Fixed effects:           |                          |                   |                    |                    | Fixed effects:  |                          |                          |                    |                    | Fixed effects:  |                   |                          |                          |                    |         |        |           |
|             |                          | <u>Estimate</u>          | <u>Std. Error</u> | <u>z value</u>     | <u>Pr(&gt; z )</u> |                 | <u>Estimate</u>          | <u>Std. Error</u>        | <u>z value</u>     | <u>Pr(&gt; z )</u> |                 | <u>Estimate</u>   | <u>Std. Error</u>        | <u>z value</u>           | <u>Pr(&gt; z )</u> |         |        |           |
|             | (Intercept)              | -1.4877                  | 0.1141            | -13.036            | <2e-16             | (Intercept)     | -0.78567                 | 0.07916                  | -9.925             | <2e-16             | (Intercept)     | -0.91908          | 0.0823                   | -11.168                  | <2e-16             |         |        |           |
|             |                          | Plausibility1            | 0.4717            | 0.2025             | 2.33               | 0.0198          |                          | Plausibility1            | -0.26474           | 0.14132            | -1.873          | 0.061             |                          | Plausibility1            | -0.02678           | 0.1672  | -0.16  | 0.873     |
|             | ArgStatus1               | 0.2451                   | 0.167             | 1.468              | 0.1422             |                 | ArgStatus1               | -0.26597                 | 0.12902            | -2.061             | 0.0393          |                   | ArgStatus1               | -0.14731                 | 0.16721            | -0.881  | 0.378  |           |
|             | Plausibility1:ArgStatus1 | -0.1555                  | 0.2865            | -0.543             | 0.5873             |                 | Plausibility1:ArgStatus1 | 0.05144                  | 0.24889            | 0.207              | 0.8363          |                   | Plausibility1:ArgStatus1 | 0.01967                  | 0.28436            | 0.069   | 0.945  |           |

Supplemental Material S2. Full model results of the gross-fixation patterns exhibited by the three groups of participants for the entire 2,000-ms window of analysis.
