# Supplementary material
Source: publisher figshare collection journal article supplement (https://asha.figshare.com/articles/dataset/_/14963553)
Supplement: Supplementary file 4 [file 1]

|       | YN                       |             |          |           |              |          | ON                       |            |            |          |              |             | PWA                      |            |          |          |              |
|-------|--------------------------|-------------|----------|-----------|--------------|----------|--------------------------|------------|------------|----------|--------------|-------------|--------------------------|------------|----------|----------|--------------|
| Bin 0 | Random effects:          |             |          |           |              |          | Random effects:          |            |            |          |              |             | Random effects:          |            |          |          |              |
|       | Groups                   | Name        | Variance | Std.Dev.  |              | Groups   | Name                     | Variance   | Std.Dev.   |          | Groups       | Name        | Variance                 | Std.Dev.   |          |          |              |
|       | Sentence                 | (Intercept) | 0.40235  | 0.6343    |              | Sentence | (Intercept)              | 0          | 0          |          | Sentence     | (Intercept) | 1.281E-15                | 3.578E-08  |          |          |              |
|       | Subject                  | (Intercept) | 0.07194  | 0.2682    |              | Subject  | (Intercept)              | 0.1158     | 0.3403     |          | Subject      | (Intercept) | 0                        | 0          |          |          |              |
|       | Fixed effects:           |             |          |           |              |          | Fixed effects:           |            |            |          |              |             | Fixed effects:           |            |          |          |              |
|       | Estimate                 | Std. Error  | z value  | Pr(> z )  |              |          | Estimate                 | Std. Error | z value    | Pr(> z ) |              |             | Estimate                 | Std. Error | z value  | Pr(> z ) |              |
|       | (Intercept)              | -0.842      | 0.13179  | -6.389    | 1.67E-10 *** |          | (Intercept)              | -1.2464    | 0.1849     | -6.74    | 1.59E-11 *** |             | (Intercept)              | -2.3772    | 0.3399   | -6.994   | 2.67E-12 *** |
|       | Plausibility1            | 0.78547     | 0.23586  | 3.33      | 8.68E-04 *** |          | Plausibility1            | 0.7557     | 0.3266     | 2.313    | 2.07E-02 *   |             | Plausibility1            | -0.2954    | 0.6798   | -0.435   | 6.64E-01     |
|       | ArgStatus1               | -0.19346    | 0.23438  | -0.825    | 0.409152     |          | ArgStatus1               | -0.1204    | 0.3283     | -0.367   | 0.7137       |             | ArgStatus1               | 0.5031     | 0.6798   | 0.74     | 0.459        |
|       | Plausibility1:ArgStatus1 | -0.03873    | 0.46863  | -0.083    | 0.934139     |          | Plausibility1:ArgStatus1 | 0.4346     | 0.6544     | 0.664    | 0.5066       |             | Plausibility1:ArgStatus1 | -1.1662    | 1.3596   | -0.858   | 0.391        |
| Bin 1 | Random effects:          |             |          |           |              |          | Random effects:          |            |            |          |              |             | Random effects:          |            |          |          |              |
|       | Groups                   | Name        | Variance | Std.Dev.  |              | Groups   | Name                     | Variance   | Std.Dev.   |          | Groups       | Name        | Variance                 | Std.Dev.   |          |          |              |
|       | Sentence                 | (Intercept) | 0.1855   | 0.4307    |              | Sentence | (Intercept)              | 0          | 0          |          | Sentence     | (Intercept) | 0.4792                   | 0.6922512  |          |          |              |
|       | Subject                  | (Intercept) | 0.1051   | 0.3242    |              | Subject  | (Intercept)              | 0.2498     | 0.4998     |          | Subject      | (Intercept) | 6.726E-07                | 0.0008201  |          |          |              |
|       | Fixed effects:           |             |          |           |              |          | Fixed effects:           |            |            |          |              |             | Fixed effects:           |            |          |          |              |
|       | Estimate                 | Std. Error  | z value  | Pr(> z )  |              |          | Estimate                 | Std. Error | z value    | Pr(> z ) |              |             | Estimate                 | Std. Error | z value  | Pr(> z ) |              |
|       | (Intercept)              | -0.7268     | 0.1198   | -6.069    | 1.29E-09 *** |          | (Intercept)              | -1.1956    | 0.2101     | -5.689   | 1.27E-08 *** |             | (Intercept)              | -1.8468    | 0.5655   | -3.266   | 1.09E-03 **  |
|       | Plausibility1            | 0.7881      | 0.2087   | 3.775     | 1.60E-04 *** |          | Plausibility1            | 0.8786     | 0.3388     | 2.594    | 9.50E-03 **  |             | Plausibility1            | 1.1765     | 0.5894   | 1.996    | 4.59E-02 *   |
|       | ArgStatus1               | 0.4164      | 0.2056   | 2.025     | 0.04283 *    |          | ArgStatus1               | -0.3353    | 0.3387     | -0.99    | 0.3223       |             | ArgStatus1               | 0.4509     | 0.556    | 0.811    | 0.41735      |
|       | Plausibility1:ArgStatus1 | 0.3398      | 0.4108   | 0.827     | 0.40822      |          | Plausibility1:ArgStatus1 | -0.2606    | 0.6782     | -0.384   | 0.7008       |             | Plausibility1:ArgStatus1 | -0.5409    | 1.1136   | -0.486   | 0.62718      |
| Bin 2 | Random effects:          |             |          |           |              |          | Random effects:          |            |            |          |              |             | Random effects:          |            |          |          |              |
|       | Groups                   | Name        | Variance | Std.Dev.  |              | Groups   | Name                     | Variance   | Std.Dev.   |          | Groups       | Name        | Variance                 | Std.Dev.   |          |          |              |
|       | Sentence                 | (Intercept) | 0.18195  | 0.4266    |              | Sentence | (Intercept)              | 0          | 0          |          | Sentence     | (Intercept) | 0                        | 0          |          |          |              |
|       | Subject                  | (Intercept) | 0.04934  | 0.2221    |              | Subject  | (Intercept)              | 4E-14      | 0.0000002  |          | Subject      | (Intercept) | 0                        | 0          |          |          |              |
|       | Fixed effects:           |             |          |           |              |          | Fixed effects:           |            |            |          |              |             | Fixed effects:           |            |          |          |              |
|       | Estimate                 | Std. Error  | z value  | Pr(> z )  |              |          | Estimate                 | Std. Error | z value    | Pr(> z ) |              |             | Estimate                 | Std. Error | z value  | Pr(> z ) |              |
|       | (Intercept)              | -0.6558     | 0.1075   | -6.101    | 1.05E-09 *** |          | (Intercept)              | -1.1786    | 0.1824     | -6.462   | 1.03E-10 *** |             | (Intercept)              | -1.3086    | 0.2123   | -6.162   | 7.17E-10 *** |
|       | Plausibility1            | 0.492       | 0.2      | 2.46      | 1.39E-02 *   |          | Plausibility1            | 0.7006     | 0.3648     | 1.921    | 5.48E-02 .   |             | Plausibility1            | 0.4625     | 0.4247   | 1.089    | 2.76E-01     |
|       | ArgStatus1               | 0.2018      | 0.1998   | 1.01      | 0.3127       |          | ArgStatus1               | 1.0291     | 0.3648     | 2.821    | 0.00478 **   |             | ArgStatus1               | -0.1748    | 0.4247   | -0.412   | 0.681        |
|       | Plausibility1:ArgStatus1 | -0.2407     | 0.3994   | -0.603    | 0.5468       |          | Plausibility1:ArgStatus1 | 0.0611     | 0.7295     | 0.084    | 0.93325      |             | Plausibility1:ArgStatus1 | -0.2067    | 0.8494   | -0.243   | 0.808        |
| Bin 3 | Random effects:          |             |          |           |              |          | Random effects:          |            |            |          |              |             | Random effects:          |            |          |          |              |
|       | Groups                   | Name        | Variance | Std.Dev.  |              | Groups   | Name                     | Variance   | Std.Dev.   |          | Groups       | Name        | Variance                 | Std.Dev.   |          |          |              |
|       | Sentence                 | (Intercept) | 0.4915   | 0.7011    |              | Sentence | (Intercept)              | 2.989E-09  | 0.00005468 |          | Sentence     | (Intercept) | 8.756E-10                | 0.00002959 |          |          |              |
|       | Subject                  | (Intercept) | 0.05012  | 0.2239    |              | Subject  | (Intercept)              | 0.2607     | 0.5105     |          | Subject      | (Intercept) | 0.08172                  | 0.2859     |          |          |              |
|       | Fixed effects:           |             |          |           |              |          | Fixed effects:           |            |            |          |              |             | Fixed effects:           |            |          |          |              |
|       | Estimate                 | Std. Error  | z value  | Pr(> z )  |              |          | Estimate                 | Std. Error | z value    | Pr(> z ) |              |             | Estimate                 | Std. Error | z value  | Pr(> z ) |              |
|       | (Intercept)              | -1.0295     | 0.1449   | -7.103    | 1.22E-12 *** |          | (Intercept)              | -1.0628    | 0.2142     | -4.962   | 6.97E-07 *** |             | (Intercept)              | -1.700002  | 0.289322 | -5.876   | 4.21E-09 *** |
|       | Plausibility1            | 0.4955      | 0.2433   | 2.036     | 4.17E-02 *   |          | Plausibility1            | 0.8789     | 0.3426     | 2.566    | 1.03E-02 *   |             | Plausibility1            | 0.69615    | 0.514594 | 1.353    | 1.76E-01     |
|       | ArgStatus1               | 0.2001      | 0.2432   | 0.823     | 0.4107       |          | ArgStatus1               | -0.1868    | 0.3316     | -0.563   | 0.5732       |             | ArgStatus1               | 0.008154   | 0.511983 | 0.016    | 0.987        |
|       | Plausibility1:ArgStatus1 | -0.4603     | 0.4847   | -0.95     | 0.3423       |          | Plausibility1:ArgStatus1 | 1.3449     | 0.6623     | 2.031    | 0.0423 *     |             | Plausibility1:ArgStatus1 | 0.027891   | 1.045263 | 0.027    | 0.979        |
| Bin 4 | Random effects:          |             |          |           |              |          | Random effects:          |            |            |          |              |             | Random effects:          |            |          |          |              |
|       | Groups                   | Name        | Variance | Std.Dev.  |              | Groups   | Name                     | Variance   | Std.Dev.   |          | Groups       | Name        | Variance                 | Std.Dev.   |          |          |              |
|       | Sentence                 | (Intercept) | 0.05328  | 0.2308    |              | Sentence | (Intercept)              | 0          | 0          |          | Sentence     | (Intercept) | 190.9                    | 13.82      |          |          |              |
|       | Subject                  | (Intercept) | 0.09675  | 0.311     |              | Subject  | (Intercept)              | 0          | 0          |          | Subject      | (Intercept) | 0                        | 0          |          |          |              |
|       | Fixed effects:           |             |          |           |              |          | Fixed effects:           |            |            |          |              |             | Fixed effects:           |            |          |          |              |
|       | Estimate                 | Std. Error  | z value  | Pr(> z )  |              |          | Estimate                 | Std. Error | z value    | Pr(> z ) |              |             | Estimate                 | Std. Error | z value  | Pr(> z ) |              |
|       | (Intercept)              | -0.91955    | 0.11378  | -8.082    | 6.38E-16 *** |          | (Intercept)              | -1.1935    | 0.1712     | -6.973   | 3.10E-12 *** |             | (Intercept)              | -8.664     | 1.5034   | -5.763   | 8.27E-09 *** |
|       | Plausibility1            | 0.67771     | 0.19587  | 3.46      | 5.40E-04 *** |          | Plausibility1            | 1.0942     | 0.3423     | 3.197    | 1.39E-03 **  |             | Plausibility1            | 0.2046     | 1.8762   | 0.109    | 9.13E-01     |
|       | ArgStatus1               | 0.40716     | 0.19541  | 2.084     | 0.0372 *     |          | ArgStatus1               | 0.3104     | 0.3423     | 0.907    | 0.36451      |             | ArgStatus1               | 1.4266     | 1.8766   | 0.76     | 0.447        |
|       | Plausibility1:ArgStatus1 | 0.06364     | 0.38995  | 0.163     | 0.87036      |          | Plausibility1:ArgStatus1 | -1.279     | 0.6846     | -1.868   | 0.06173 .    |             | Plausibility1:ArgStatus1 | -1.0313    | 3.7524   | -0.275   | 0.783        |
| Bin 5 | Random effects:          |             |          |           |              |          | Random effects:          |            |            |          |              |             | Random effects:          |            |          |          |              |
|       | Groups                   | Name        | Variance | Std.Dev.  |              | Groups   | Name                     | Variance   | Std.Dev.   |          | Groups       | Name        | Variance                 | Std.Dev.   |          |          |              |
|       | Sentence                 | (Intercept) | 0.23081  | 0.4804    |              | Sentence | (Intercept)              | 0.1179     | 0.3434     |          | Sentence     | (Intercept) | 1.06E-13                 | 3.256E-07  |          |          |              |
|       | Subject                  | (Intercept) | 0.04708  | 0.217     |              | Subject  | (Intercept)              | 0          | 0          |          | Subject      | (Intercept) | 0                        | 0          |          |          |              |
|       | Fixed effects:           |             |          |           |              |          | Fixed effects:           |            |            |          |              |             | Fixed effects:           |            |          |          |              |
|       | Estimate                 | Std. Error  | z value  | Pr(> z )  |              |          | Estimate                 | Std. Error | z value    | Pr(> z ) |              |             | Estimate                 | Std. Error | z value  | Pr(> z ) |              |
|       | (Intercept)              | -0.5838     | 0.1108   | -5.269    | 1.37E-07 *** |          | (Intercept)              | -0.788752  | 0.168356   | -4.685   | 2.80E-06 *** |             | (Intercept)              | -1.3387    | 0.2164   | -6.187   | 6.12E-10 *** |
|       | Plausibility1            | 0.329       | 0.2065   | 1.593     | 1.11E-01     |          | Plausibility1            | 0.69701    | 0.310343   | 2.246    | 2.47E-02 *   |             | Plausibility1            | 0.9062     | 0.4327   | 2.094    | 3.62E-02 *   |
|       | ArgStatus1               | 0.3695      | 0.2074   | 1.781     | 0.0748 .     |          | ArgStatus1               | 0.117272   | 0.307458   | 0.381    | 0.7029       |             | ArgStatus1               | 0.1705     | 0.4327   | 0.394    | 0.6936       |
|       | Plausibility1:ArgStatus1 | 0.1326      | 0.4113   | 0.322     | 0.7472       |          | Plausibility1:ArgStatus1 | 0.001305   | 0.613277   | 0.002    | 0.9983       |             | Plausibility1:ArgStatus1 | 1.4917     | 0.8654   | 1.724    | 0.0848 .     |
| Bin 6 | Random effects:          |             |          |           |              |          | Random effects:          |            |            |          |              |             | Random effects:          |            |          |          |              |
|       | Groups                   | Name        | Variance | Std.Dev.  |              | Groups   | Name                     | Variance   | Std.Dev.   |          | Groups       | Name        | Variance                 | Std.Dev.   |          |          |              |
|       | Sentence                 | (Intercept) | 0.0605   | 0.246     |              | Sentence | (Intercept)              | 0.1147     | 0.3387     |          | Sentence     | (Intercept) | 4E-14                    | 0.0000002  |          |          |              |
|       | Subject                  | (Intercept) | 1.46E-10 | 0.0000121 |              | Subject  | (Intercept)              | 7.364E-10  | 0.00002714 |          | Subject      | (Intercept) | 8.347E-16                | 2.889E-08  |          |          |              |
|       | Fixed effects:           |             |          |           |              |          | Fixed effects:           |            |            |          |              |             | Fixed effects:           |            |          |          |              |
|       | Estimate                 | Std. Error  | z value  | Pr(> z )  |              |          | Estimate                 | Std. Error | z value    | Pr(> z ) |              |             | Estimate                 | Std. Error | z value  | Pr(> z ) |              |
|       | (Intercept)              | -0.66929    | 0.10081  | -6.639    | 3.15E-11 *** |          | (Intercept)              | -0.7305    | 0.184      | -3.97    | 7.18E-05 *** |             | (Intercept)              | -1.5638    | 0.2653   | -5.894   | 3.78E-09 *** |
|       | Plausibility1            | 0.43299     | 0.19581  | 2.211     | 2.70E-02 *   |          | Plausibility1            | 1.1794     | 0.3529     | 3.343    | 8.30E-04 *** |             | Plausibility1            | 0.993      | 0.5307   | 1.871    | 6.13E-02 .   |
|       | ArgStatus1               | 0.26107     | 0.1955   | 1.335     | 0.182        |          | ArgStatus1               | 0.1153     | 0.332      | 0.347    | 0.72836      |             | ArgStatus1               | -0.5475    | 0.5307   | -1.032   | 0.3023       |
|       | Plausibility1:ArgStatus1 | -0.06722    | 0.39156  | -0.172    | 0.864        |          | Plausibility1:ArgStatus1 | 0.1582     | 0.6638     | 0.238    | 0.81167      |             | Plausibility1:ArgStatus1 | 1.22       | 1.0614   | 1.149    | 0.2504       |
| Bin 7 | Random effects:          |             |          |           |              |          | Random effects:          |            |            |          |              |             | Random effects:          |            |          |          |              |
|       | Groups                   | Name        | Variance | Std.Dev.  |              | Groups   | Name                     | Variance   | Std.Dev.   |          | Groups       | Name        | Variance                 | Std.Dev.   |          |          |              |
|       | Sentence                 | (Intercept) | 0.1088   | 0.3298    |              | Sentence | (Intercept)              | 0          | 0          |          | Sentence     | (Intercept) | 524.3                    | 22.898     |          |          |              |
|       | Subject                  | (Intercept) | 0.1625   | 0.4031    |              | Subject  | (Intercept)              | 0          | 0          |          | Subject      | (Intercept) | 34.62                    | 5.884      |          |          |              |

## Bin 7

| Fixed effects:           |          |            |         |              |
|--------------------------|----------|------------|---------|--------------|
|                          | Estimate | Std. Error | z_value | Pr(> z )     |
| (Intercept)              | -0.7738  | 0.1209     | -6.402  | 1.53E-10 *** |
| Plausibility1            | 0.7263   | 0.2019     | 3.598   | 3.21E-04 *** |
| ArgStatus1               | 0.4756   | 0.2012     | 2.364   | 0.018092 *   |
| Plausibility1:ArgStatus1 | 0.3769   | 0.4001     | 0.942   | 0.346201     |

| Random effects: |             |             |          |
|-----------------|-------------|-------------|----------|
| Groups          | Name        | Variance    | Std.Dev. |
| Sentence        | (Intercept) | 0.2107      | 0.4591   |
|                 | Subject     | (Intercept) | 0.1965   |

## Bin 8

| Fixed effects:           |          |            |         |              |
|--------------------------|----------|------------|---------|--------------|
|                          | Estimate | Std. Error | z_value | Pr(> z )     |
| (Intercept)              | -0.9248  | 0.1388     | -6.663  | 2.68E-11 *** |
| Plausibility1            | 0.5509   | 0.2226     | 2.475   | 1.33E-02 *   |
| ArgStatus1               | 0.5279   | 0.223      | 2.368   | 0.0179 *     |
| Plausibility1:ArgStatus1 | -0.7558  | 0.4447     | -1.699  | 0.0893 .     |

| Random effects: |             |             |          |
|-----------------|-------------|-------------|----------|
| Groups          | Name        | Variance    | Std.Dev. |
| Sentence        | (Intercept) | 0.1812      | 0.4257   |
|                 | Subject     | (Intercept) | 0        |

## Bin 9

| Fixed effects:           |          |            |         |              |
|--------------------------|----------|------------|---------|--------------|
|                          | Estimate | Std. Error | z_value | Pr(> z )     |
| (Intercept)              | -0.52563 | 0.10205    | -5.151  | 2.59E-07 *** |
| Plausibility1            | 0.78404  | 0.20355    | 3.852   | 1.17E-04 *** |
| ArgStatus1               | 0.48679  | 0.20091    | 2.423   | 0.015397 *   |
| Plausibility1:ArgStatus1 | 0.02972  | 0.39833    | 0.075   | 0.940524     |

| Random effects: |             |             |          |
|-----------------|-------------|-------------|----------|
| Groups          | Name        | Variance    | Std.Dev. |
| Sentence        | (Intercept) | 0.1448      | 0.3805   |
|                 | Subject     | (Intercept) | 0.1371   |

## Bin 10

| Fixed effects:           |          |            |         |              |
|--------------------------|----------|------------|---------|--------------|
|                          | Estimate | Std. Error | z_value | Pr(> z )     |
| (Intercept)              | -0.5105  | 0.115      | -4.438  | 9.08E-06 *** |
| Plausibility1            | 0.8349   | 0.1992     | 4.19    | 2.79E-05 *** |
| ArgStatus1               | 0.1801   | 0.1959     | 0.919   | 0.358        |
| Plausibility1:ArgStatus1 | 0.1629   | 0.3912     | 0.416   | 0.677        |

| Random effects: |             |             |           |
|-----------------|-------------|-------------|-----------|
| Groups          | Name        | Variance    | Std.Dev.  |
| Sentence        | (Intercept) | 0.528       | 0.7264607 |
|                 | Subject     | (Intercept) | 4.98E-08  |

## Bin 11

| Fixed effects:           |          |            |         |              |
|--------------------------|----------|------------|---------|--------------|
|                          | Estimate | Std. Error | z_value | Pr(> z )     |
| (Intercept)              | -0.6371  | 0.11994    | -5.312  | 1.09E-07 *** |
| Plausibility1            | 0.90326  | 0.23498    | 3.844   | 1.21E-04 *** |
| ArgStatus1               | 0.31285  | 0.23442    | 1.335   | 0.182018     |
| Plausibility1:ArgStatus1 | -0.06402 | 0.4659     | -0.137  | 0.890701     |

| Random effects: |             |             |          |
|-----------------|-------------|-------------|----------|
| Groups          | Name        | Variance    | Std.Dev. |
| Sentence        | (Intercept) | 0.5536      | 0.744    |
|                 | Subject     | (Intercept) | 0.1727   |

## Bin 12

| Fixed effects:           |          |            |         |              |
|--------------------------|----------|------------|---------|--------------|
|                          | Estimate | Std. Error | z_value | Pr(> z )     |
| (Intercept)              | -0.21716 | 0.13353    | -1.626  | 1.04E-01     |
| Plausibility1            | 1.32341  | 0.24339    | 5.437   | 5.41E-08 *** |
| ArgStatus1               | -0.02502 | 0.23249    | -0.108  | 0.914        |
| Plausibility1:ArgStatus1 | -0.60492 | 0.46701    | -1.295  | 0.195        |

| Random effects: |             |             |          |
|-----------------|-------------|-------------|----------|
| Groups          | Name        | Variance    | Std.Dev. |
| Sentence        | (Intercept) | 0.41422     | 0.6436   |
|                 | Subject     | (Intercept) | 0.06409  |

## Bin 13

| Fixed effects:           |          |            |         |              |
|--------------------------|----------|------------|---------|--------------|
|                          | Estimate | Std. Error | z_value | Pr(> z )     |
| (Intercept)              | -0.4731  | 0.1241     | -3.813  | 1.37E-04 *** |
| Plausibility1            | 1.4379   | 0.2459     | 5.847   | 5.00E-09 *** |
| ArgStatus1               | 0.3826   | 0.2345     | 1.631   | 0.102839     |
| Plausibility1:ArgStatus1 | 0.3974   | 0.4634     | 0.858   | 0.391165     |

| Random effects: |             |             |          |
|-----------------|-------------|-------------|----------|
| Groups          | Name        | Variance    | Std.Dev. |
| Sentence        | (Intercept) | 0.342       | 0.5848   |
|                 | Subject     | (Intercept) | 0.3436   |

## Bin 14

| Fixed effects:           |           |            |         |            |
|--------------------------|-----------|------------|---------|------------|
|                          | Estimate  | Std. Error | z_value | Pr(> z )   |
| (Intercept)              | -0.516197 | 0.001754   | -294.4  | <2e-16 *** |
| Plausibility1            | 1.364165  | 0.001811   | 753.3   | <2e-16 *** |
| ArgStatus1               | -0.07727  | 0.001753   | -44.1   | <2e-16 *** |
| Plausibility1:ArgStatus1 | 0.018921  | 0.001753   | 10.8    | <2e-16 *** |

| Fixed effects:           |          |            |         |              |
|--------------------------|----------|------------|---------|--------------|
|                          | Estimate | Std. Error | z_value | Pr(> z )     |
| (Intercept)              | -0.83179 | 0.14367    | -5.79   | 7.05E-09 *** |
| Plausibility1            | 0.50612  | 0.28734    | 1.761   | 7.82E-02 .   |
| ArgStatus1               | 0.27128  | 0.28734    | 0.944   | 0.3451       |
| Plausibility1:ArgStatus1 | -0.08488 | 0.57467    | -0.148  | 0.8826       |

| Random effects: |             |             |           |
|-----------------|-------------|-------------|-----------|
| Groups          | Name        | Variance    | Std.Dev.  |
| Sentence        | (Intercept) | 4E-14       | 0.0000002 |
|                 | Subject     | (Intercept) | 0         |

| Fixed effects:           |          |            |         |              |
|--------------------------|----------|------------|---------|--------------|
|                          | Estimate | Std. Error | z_value | Pr(> z )     |
| (Intercept)              | -0.5088  | 0.1531     | -3.323  | 8.92E-04 *** |
| Plausibility1            | 0.7171   | 0.3062     | 2.342   | 1.92E-02 *   |
| ArgStatus1               | 0.6152   | 0.3062     | 2.009   | 0.044565 *   |
| Plausibility1:ArgStatus1 | 0.3051   | 0.6125     | 0.498   | 0.61842      |

| Random effects: |             |             |          |
|-----------------|-------------|-------------|----------|
| Groups          | Name        | Variance    | Std.Dev. |
| Sentence        | (Intercept) | 0           | 0        |
|                 | Subject     | (Intercept) | 0        |

| Fixed effects:           |          |            |         |              |
|--------------------------|----------|------------|---------|--------------|
|                          | Estimate | Std. Error | z_value | Pr(> z )     |
| (Intercept)              | -0.77716 | 0.15092    | -5.15   | 2.61E-07 *** |
| Plausibility1            | 1.11248  | 0.30184    | 3.686   | 2.28E-04 *** |
| ArgStatus1               | 0.47675  | 0.30184    | 1.58    | 0.114217     |
| Plausibility1:ArgStatus1 | -0.06984 | 0.60367    | -0.116  | 0.907891     |

| Random effects: |             |             |            |
|-----------------|-------------|-------------|------------|
| Groups          | Name        | Variance    | Std.Dev.   |
| Sentence        | (Intercept) | 5.216E-09   | 0.00007222 |
|                 | Subject     | (Intercept) | 0.08522    |

| Fixed effects:           |          |            |         |             |
|--------------------------|----------|------------|---------|-------------|
|                          | Estimate | Std. Error | z_value | Pr(> z )    |
| (Intercept)              | -0.28199 | 0.15541    | -1.814  | 6.96E-02 .  |
| Plausibility1            | 0.78995  | 0.27717    | 2.85    | 4.37E-03 ** |
| ArgStatus1               | 0.03006  | 0.27622    | 0.109   | 0.91335     |
| Plausibility1:ArgStatus1 | 0.54134  | 0.55475    | 0.976   | 0.32915     |

| Random effects: |             |             |          |
|-----------------|-------------|-------------|----------|
| Groups          | Name        | Variance    | Std.Dev. |
| Sentence        | (Intercept) | 0.04423     | 0.2103   |
|                 | Subject     | (Intercept) | 0        |

| Fixed effects:           |          |            |         |            |
|--------------------------|----------|------------|---------|------------|
|                          | Estimate | Std. Error | z_value | Pr(> z )   |
| (Intercept)              | -0.36109 | 0.15188    | -2.377  | 1.74E-02 * |
| Plausibility1            | 0.74435  | 0.3018     | 2.466   | 1.37E-02 * |
| ArgStatus1               | 0.07425  | 0.30278    | 0.245   | 0.8063     |
| Plausibility1:ArgStatus1 | 0.59075  | 0.60192    | 0.981   | 0.3264     |

| Random effects: |             |             |           |
|-----------------|-------------|-------------|-----------|
| Groups          | Name        | Variance    | Std.Dev.  |
| Sentence        | (Intercept) | 0.692       | 0.8319    |
|                 | Subject     | (Intercept) | 2.461E-10 |

| Fixed effects:           |          |            |         |              |
|--------------------------|----------|------------|---------|--------------|
|                          | Estimate | Std. Error | z_value | Pr(> z )     |
| (Intercept)              | -0.2884  | 0.1795     | -1.607  | 1.08E-01     |
| Plausibility1            | 1.3797   | 0.3869     | 3.566   | 3.63E-04 *** |
| ArgStatus1               | 0.9838   | 0.3609     | 2.726   | 0.006406 **  |
| Plausibility1:ArgStatus1 | -0.3214  | 0.7075     | -0.454  | 0.649641     |

| Random effects: |             |             |          |
|-----------------|-------------|-------------|----------|
| Groups          | Name        | Variance    | Std.Dev. |
| Sentence        | (Intercept) | 0.8667      | 0.9309   |
|                 | Subject     | (Intercept) | 0.4998   |

| Fixed effects:           |          |            |         |              |
|--------------------------|----------|------------|---------|--------------|
|                          | Estimate | Std. Error | z_value | Pr(> z )     |
| (Intercept)              | -0.433   | 0.2585     | -1.675  | 9.39E-02 .   |
| Plausibility1            | 1.7701   | 0.474      | 3.734   | 1.88E-04 *** |
| ArgStatus1               | 0.2112   | 0.3804     | 0.555   | 0.57873      |
| Plausibility1:ArgStatus1 | 1.0019   | 0.7863     | 1.274   | 0.202629     |

| Random effects: |             |             |           |
|-----------------|-------------|-------------|-----------|
| Groups          | Name        | Variance    | Std.Dev.  |
| Sentence        | (Intercept) | 0.1086      | 0.3295    |
|                 | Subject     | (Intercept) | 1.212E-10 |

| Fixed effects:           |          |            |         |              |
|--------------------------|----------|------------|---------|--------------|
|                          | Estimate | Std. Error | z_value | Pr(> z )     |
| (Intercept)              | -0.24563 | 0.16365    | -1.501  | 1.33E-01     |
| Plausibility1            | 1.48189  | 0.36112    | 4.104   | 4.07E-05 *** |
| ArgStatus1               | -0.07022 | 0.32511    | -0.216  | 0.829        |
| Plausibility1:ArgStatus1 | -0.58994 | 0.64937    | -0.908  | 0.364        |

| Fixed effects:           |           |            |         |             |
|--------------------------|-----------|------------|---------|-------------|
|                          | Estimate  | Std. Error | z_value | Pr(> z )    |
| (Intercept)              | -13.55763 | 4.98746    | -2.718  | 6.56E-03 ** |
| Plausibility1            | 0.25486   | 2.49614    | 0.102   | 9.19E-01    |
| ArgStatus1               | 2.07746   | 2.90888    | 0.714   | 0.47512     |
| Plausibility1:ArgStatus1 | 0.01746   | 4.99361    | 0.004   | 0.99721     |

| Random effects: |             |             |            |
|-----------------|-------------|-------------|------------|
| Groups          | Name        | Variance    | Std.Dev.   |
| Sentence        | (Intercept) | 5.534E-10   | 0.00002352 |
|                 | Subject     | (Intercept) | 0.06785    |

| Fixed effects:           |          |            |         |              |
|--------------------------|----------|------------|---------|--------------|
|                          | Estimate | Std. Error | z_value | Pr(> z )     |
| (Intercept)              | -1.5867  | 0.2677     | -5.927  | 3.08E-09 *** |
| Plausibility1            | 0.25     | 0.4598     | 0.544   | 5.87E-01     |
| ArgStatus1               | 0.4525   | 0.4708     | 0.961   | 0.336        |
| Plausibility1:ArgStatus1 | 0.8468   | 0.9219     | 0.919   | 0.358        |

| Random effects: |             |             |          |
|-----------------|-------------|-------------|----------|
| Groups          | Name        | Variance    | Std.Dev. |
| Sentence        | (Intercept) | 410.9       | 20.271   |
|                 | Subject     | (Intercept) | 40.06    |

| Fixed effects:           |          |            |         |          |
|--------------------------|----------|------------|---------|----------|
|                          | Estimate | Std. Error | z_value | Pr(> z ) |
| (Intercept)              | -16.284  | 7.053      | -2.309  | 2.10E-02 |
| Plausibility1            | 5.826    | 13.56      | 0.43    | 6.67E-01 |
| ArgStatus1               | -4.56    | 13.601     | -0.335  | 0.737    |
| Plausibility1:ArgStatus1 | 9.629    | 27.446     | 0.351   | 0.726    |

| Random effects: |             |             |          |
|-----------------|-------------|-------------|----------|
| Groups          | Name        | Variance    | Std.Dev. |
| Sentence        | (Intercept) | 2818.8      | 53.09    |
|                 | Subject     | (Intercept) | 572.4    |

| Fixed effects:           |          |            |         |            |
|--------------------------|----------|------------|---------|------------|
|                          | Estimate | Std. Error | z_value | Pr(> z )   |
| (Intercept)              | -25.45   | 13.553     | -1.878  | 6.04E-02 . |
| Plausibility1            | 1.415    | 3.611      | 0.392   | 6.95E-01   |
| ArgStatus1               | 1.155    | 3.679      | 0.314   | 0.7534     |
| Plausibility1:ArgStatus1 | 3.056    | 7.03       | 0.435   | 0.6638     |

| Random effects: |             |             |            |
|-----------------|-------------|-------------|------------|
| Groups          | Name        | Variance    | Std.Dev.   |
| Sentence        | (Intercept) | 6.544E-10   | 0.00002558 |
|                 | Subject     | (Intercept) | 0.2127     |

| Fixed effects:           |          |            |         |              |
|--------------------------|----------|------------|---------|--------------|
|                          | Estimate | Std. Error | z_value | Pr(> z )     |
| (Intercept)              | -1.2937  | 0.263      | -4.919  | 8.71E-07 *** |
| Plausibility1            | 0.4212   | 0.424      | 0.993   | 3.21E-01     |
| ArgStatus1               | 0.5431   | 0.4261     | 1.275   | 0.202        |
| Plausibility1:ArgStatus1 | -0.6327  | 0.8538     | -0.741  | 0.459        |

| Random effects: |             |             |          |
|-----------------|-------------|-------------|----------|
| Groups          | Name        | Variance    | Std.Dev. |
| Sentence        | (Intercept) | 0.6859      | 0.8282   |
|                 | Subject     | (Intercept) | 0.2032   |

| Fixed effects:           |          |            |         |             |
|--------------------------|----------|------------|---------|-------------|
|                          | Estimate | Std. Error | z_value | Pr(> z )    |
| (Intercept)              | -1.43881 | 0.43741    | -3.289  | 1.00E-03 ** |
| Plausibility1            | 0.25665  | 0.54708    | 0.469   | 6.39E-01    |
| ArgStatus1               | 0.07777  | 0.54298    | 0.143   | 0.886       |
| Plausibility1:ArgStatus1 | 0.80004  | 1.11519    | 0.717   | 0.473       |

| Random effects: |             |             |            |
|-----------------|-------------|-------------|------------|
| Groups          | Name        | Variance    | Std.Dev.   |
| Sentence        | (Intercept) | 3.105E-10   | 0.00001762 |
|                 | Subject     | (Intercept) | 0.262      |

| Fixed effects:           |          |            |         |              |
|--------------------------|----------|------------|---------|--------------|
|                          | Estimate | Std. Error | z_value | Pr(> z )     |
| (Intercept)              | -1.20563 | 0.27295    | -4.417  | 1.00E-05 *** |
| Plausibility1            | 1.18151  | 0.42773    | 2.762   | 5.74E-03 **  |
| ArgStatus1               | 0.73994  | 0.41917    | 1.765   | 0.07752 .    |
| Plausibility1:ArgStatus1 | 0.08412  | 0.83786    | 0.1     | 0.92003      |

Bin 15

|                          |             |            |           |              |
|--------------------------|-------------|------------|-----------|--------------|
| Random effects:          |             |            |           |              |
| Groups                   | Name        | Variance   | Std.Dev.  |              |
| Sentence                 | (Intercept) | 1.69E-09   | 0.0000411 |              |
| Subject                  | (Intercept) | 0.21       | 0.458     |              |
| Fixed effects:           |             |            |           |              |
|                          | Estimate    | Std. Error | z value   | Pr(> z )     |
| (Intercept)              | -0.4335     | 0.1259     | -3.443    | 5.74E-04 *** |
| Plausibility1            | 1.1033      | 0.2033     | 5.427     | 5.73E-08 *** |
| ArgStatus1               | 0.2142      | 0.199      | 1.076     | 0.281811     |
| Plausibility1:ArgStatus1 | 0.2417      | 0.3939     | 0.614     | 0.539374     |

|        |                          |             |            |          |              |
|--------|--------------------------|-------------|------------|----------|--------------|
| Bin 16 | Random effects:          |             |            |          |              |
|        | Groups                   | Name        | Variance   | Std.Dev. |              |
|        | Sentence                 | (Intercept) | 0.2182     | 0.4671   |              |
|        | Subject                  | (Intercept) | 0.2364     | 0.4862   |              |
|        | Fixed effects:           |             |            |          |              |
|        |                          | Estimate    | Std. Error | z value  | Pr(> z )     |
|        | (Intercept)              | -0.4887     | 0.1368     | -3.572   | 3.54E-04 *** |
|        | Plausibility1            | 1.1073      | 0.235      | 4.711    | 2.46E-06 *** |
|        | ArgStatus1               | -0.138      | 0.2212     | -0.624   | 0.532703     |
|        | Plausibility1:ArgStatus1 | 0.5201      | 0.4406     | 1.181    | 0.237792     |

|        |                          |             |          |          |              |
|--------|--------------------------|-------------|----------|----------|--------------|
| Bin 17 | Random effects:          |             |          |          |              |
|        | Groups                   | Name        | Variance | Std.Dev. |              |
|        | Sentence                 | (Intercept) | 0.06149  | 0.248    |              |
|        | Subject                  | (Intercept) | 0.21566  | 0.4644   |              |
|        | Fixed effects:           |             |          |          |              |
|        | Estimate                 | Std. Error  | z value  | Pr(> z ) |              |
|        | (Intercept)              | -0.4255     | 0.1358   | -3.134   | 1.72E-03 **  |
|        | Plausibility1            | 1.1345      | 0.2409   | 4.71     | 2.48E-06 *** |
|        | ArgStatus1               | -0.1511     | 0.2235   | -0.676   | 0.49897      |
|        | Plausibility1:ArgStatus1 | 0.1545      | 0.4496   | 0.344    | 0.73113      |

|        |                          |             |            |          |              |
|--------|--------------------------|-------------|------------|----------|--------------|
| Bin 18 | Random effects:          |             |            |          |              |
|        | Groups                   | Name        | Variance   | Std.Dev. |              |
|        | Sentence                 | (Intercept) | 0.05363    | 0.2316   |              |
|        | Subject                  | (Intercept) | 0.2377     | 0.4875   |              |
|        | Fixed effects:           |             |            |          |              |
|        |                          | Estimate    | Std. Error | z value  | Pr(> z )     |
|        | (Intercept)              | -0.80836    | 0.14274    | -5.663   | 1.48E-08 *** |
|        | Plausibility1            | 1.01986     | 0.2344     | 4.351    | 1.36E-05 *** |
|        | ArgStatus1               | 0.11676     | 0.22652    | 0.515    | 0.606        |
|        | Plausibility1:ArgStatus1 | 0.07254     | 0.45746    | 0.159    | 0.874        |

|        |                          |             |            |          |              |
|--------|--------------------------|-------------|------------|----------|--------------|
| Bin 19 | Random effects:          |             |            |          |              |
|        | Groups                   | Name        | Variance   | Std.Dev. |              |
|        | Sentence                 | (Intercept) | 0.1332     | 0.365    |              |
|        | Subject                  | (Intercept) | 0.1591     | 0.3989   |              |
|        | Fixed effects:           |             |            |          |              |
|        |                          | Estimate    | Std. Error | z value  | Pr(> z )     |
|        | (Intercept)              | -0.65055    | 0.13385    | -4.86    | 1.17E-06 *** |
|        | Plausibility1            | 0.77562     | 0.24373    | 3.182    | 1.46E-03 **  |
|        | ArgStatus1               | 0.22596     | 0.23802    | 0.949    | 0.34245      |
|        | Plausibility1:ArgStatus1 | -0.05661    | 0.47018    | -0.12    | 0.90416      |

|                          |             |            |          |             |
|--------------------------|-------------|------------|----------|-------------|
| Random effects:          |             |            |          |             |
| Groups                   | Name        | Variance   | Std.Dev. |             |
| Sentence                 | (Intercept) | 0.5229     | 0.7231   |             |
| Subject                  | (Intercept) | 0.1237     | 0.3517   |             |
| Fixed effects:           |             |            |          |             |
|                          | Estimate    | Std. Error | z value  | Pr(> z )    |
| (Intercept)              | -0.6111     | 0.219      | -2.79    | 5.27E-03**  |
| Plausibility1            | 1.9726      | 0.462      | 4.27     | 1.96E-05*** |
| ArgStatus1               | 0.2962      | 0.3757     | 0.788    | 0.43052     |
| Plausibility1:ArgStatus1 | 0.115       | 0.7465     | 0.154    | 0.8776      |

|                          |             |            |                  |             |
|--------------------------|-------------|------------|------------------|-------------|
| Random effects:          |             |            |                  |             |
| Groups                   | Name        | Variance   | Std.Dev.         |             |
| Sentence                 | (Intercept) | 0          | 0                |             |
| Subject                  | (Intercept) | 0.003266   | 0.05715          |             |
| Fixed effects:           |             |            |                  |             |
|                          | Estimate    | Std. Error | z value Pr(> z ) |             |
| (Intercept)              | -0.48203    | 0.15588    | -3.092           | 1.99E-03**  |
| Plausibility1            | 1.18705     | 0.30945    | 3.836            | 1.25E-04*** |
| ArgStatus1               | -0.06831    | 0.30964    | -0.221           | 0.825391    |
| Plausibility1:ArgStatus1 | 0.27698     | 0.61929    | 0.447            | 0.654691    |

|                          |             |            |                  |             |
|--------------------------|-------------|------------|------------------|-------------|
| Random effects:          |             |            |                  |             |
| Groups                   | Name        | Variance   | Std.Dev.         |             |
| Sentence                 | (Intercept) | 0.03391    | 0.1841           |             |
| Subject                  | (Intercept) | 0.12091    | 0.3477           |             |
| Fixed effects:           |             |            |                  |             |
|                          | Estimate    | Std. Error | z value Pr(> z ) |             |
| (Intercept)              | -0.419      | 0.1879     | -2.23            | 2.58E-02*   |
| Plausibility1            | 1.4116      | 0.3529     | 4                | 6.33E-05*** |
| ArgStatus1               | 0.379       | 0.329      | 1.152            | 0.2493      |
| Plausibility1:ArgStatus1 | -0.1804     | 0.6535     | -0.276           | 0.7825      |

|                          |                 |                   |                 |                    |
|--------------------------|-----------------|-------------------|-----------------|--------------------|
| Random effects:          |                 |                   |                 |                    |
| Groups                   | <u>Name</u>     | <u>Variance</u>   | <u>Std.Dev.</u> |                    |
| Sentence                 | (Intercept)     | 0                 | 0               |                    |
| Subject                  | (Intercept)     | 0.001921          | 0.04383         |                    |
| Fixed effects:           |                 |                   |                 |                    |
|                          | <u>Estimate</u> | <u>Std. Error</u> | <u>z value</u>  | <u>Pr(&gt; z )</u> |
| (Intercept)              | -0.4974         | 0.1677            | -2.965          | 3.02E-03**         |
| Plausibility1            | 1.1294          | 0.3411            | 3.311           | 9.30E-04***        |
| ArgStatus1               | 0.1763          | 0.3358            | 0.525           | 0.5996             |
| Plausibility1:ArgStatus1 | 0.3885          | 0.6884            | 0.564           | 0.57255            |

|                          |                 |                   |                                   |
|--------------------------|-----------------|-------------------|-----------------------------------|
| Random effects:          |                 |                   |                                   |
| Groups                   | <u>Name</u>     | <u>Variance</u>   | <u>Std.Dev.</u>                   |
| Sentence                 | (Intercept)     | 0.1968            | 0.4436                            |
| Subject                  | (Intercept)     | 0                 | 0                                 |
| Fixed effects:           |                 |                   |                                   |
|                          | <u>Estimate</u> | <u>Std. Error</u> | <u>z value</u> <u>Pr(&gt; z )</u> |
| (Intercept)              | -0.57993        | 0.17841           | -3.25 1.15E-03**                  |
| Plausibility1            | 1.03353         | 0.38587           | 2.678 7.40E-03**                  |
| ArgStatus1               | 0.03722         | 0.35961           | 0.104 0.91755                     |
| Plausibility1:ArgStatus1 | -0.07559        | 0.70832           | -0.107 0.91501                    |

|                          |             |            |           |             |
|--------------------------|-------------|------------|-----------|-------------|
| Random effects:          |             |            |           |             |
| Groups                   | Name        | Variance   | Std.Dev.  |             |
| Sentence                 | (Intercept) | 4E-14      | 0.0000002 |             |
| Subject                  | (Intercept) | 0          | 0         |             |
| Fixed effects:           |             |            |           |             |
|                          | Estimate    | Std. Error | z_value   | Pr(> z )    |
| (Intercept)              | -1.4263     | 0.2359     | -6.046    | 1.48E-09*** |
| Plausibility1            | 0.6396      | 0.4718     | 1.356     | 1.75E-01    |
| ArgStatus1               | 0.6822      | 0.4718     | 1.446     | 0.148       |
| Plausibility1:ArgStatus1 | -0.8617     | 0.9436     | -0.913    | 0.361       |

| Random effects:          |             |            |          |             |
|--------------------------|-------------|------------|----------|-------------|
| Groups                   | Name        | Variance   | Std.Dev. |             |
| Sentence                 | (Intercept) | 0          | 0        |             |
| Subject                  | (Intercept) | 0          | 0        |             |
| Fixed effects:           |             |            |          |             |
|                          | Estimate    | Std. Error | z_value  | Pr(> z )    |
| (Intercept)              | -1.0154     | 0.20874    | -4.864   | 1.15E-06*** |
| Plausibility1            | 0.48227     | 0.41748    | 1.155    | 2.48E-01    |
| ArgStatus1               | -0.05672    | 0.41748    | -0.136   | 0.892       |
| Plausibility1:ArgStatus1 | 0.26011     | 0.83495    | 0.312    | 0.755       |

|                          |             |            |            |             |
|--------------------------|-------------|------------|------------|-------------|
| Random effects:          |             |            |            |             |
| Groups                   | Name        | Variance   | Std.Dev.   |             |
| Sentence                 | (Intercept) | 2.374E-09  | 0.00004872 |             |
| Subject                  | (Intercept) | 0.1707     | 0.4132     |             |
| Fixed effects:           |             |            |            |             |
|                          | Estimate    | Std. Error | z_value    | Pr(> z )    |
| (Intercept)              | -1.0079     | 0.2677     | -3.766     | 1.66E-04*** |
| Plausibility1            | 0.1916      | 0.4367     | 0.439      | 6.61E-01    |
| ArgStatus1               | 0.1904      | 0.437      | 0.436      | 0.663005    |
| Plausibility1:ArgStatus1 | -0.4612     | 0.8797     | -0.524     | 0.600118    |

|                          |             |            |          |            |
|--------------------------|-------------|------------|----------|------------|
| Random effects:          |             |            |          |            |
| Groups                   | Name        | Variance   | Std.Dev. |            |
| Sentence                 | (Intercept) | 0.1584     | 0.3981   |            |
| Subject                  | (Intercept) | 0.2914     | 0.5398   |            |
| Fixed effects:           |             |            |          |            |
|                          | Estimate    | Std. Error | z_value  | Pr(> z )   |
| (Intercept)              | -0.9641     | 0.2981     | -3.234   | 1.22E-03** |
| Plausibility1            | -0.2233     | 0.416      | -0.537   | 5.91E-01   |
| ArgStatus1               | 0.1162      | 0.4115     | 0.282    | 0.77762    |
| Plausibility1:ArgStatus1 | -1.7382     | 0.8511     | -2.042   | 0.04113*   |

|                          |             |            |          |
|--------------------------|-------------|------------|----------|
| Random effects:          |             |            |          |
| Groups                   | Name        | Variance   | Std.Dev. |
| Sentence                 | (Intercept) | 0.01097    | 0.1047   |
| Subject                  | (Intercept) | 0          | 0        |
| Fixed effects:           |             |            |          |
|                          | Estimate    | Std. Error | z_value  |
| (Intercept)              | -0.8907     | 0.252      | -3.535   |
| Plausibility1            | 0.4663      | 0.4524     | 1.031    |
| ArgStatus1               | 0.5011      | 0.4468     | 1.121    |
| Plausibility1:ArgStatus1 | -0.5328     | 0.8903     | -0.598   |

Supplemental Material S3. Full model results of the unfolding pattern of gazes to the location and other images during the course of the 2,000-ms window.
